# Supplementary material for: Escape from abluminal LRP1-mediated clearance for boosted nanoparticle brain delivery and brain metastasis treatment
Source: PubMed Central journal article supplement — Acta Pharm Sin B. 2020 Oct 21;11(5):1341–54. doi: 10.1016/j.apsb.2020.10.015 (PMC8148067; doi:10.1016/j.apsb.2020.10.015), 2020-10-21
Supplement: mmc1.pdf [file mmc1.pdf]

**Supporting Information for**

**ORIGINAL ARTICLE**

**Escape from abluminal LRP1-mediated clearance for boosted nanoparticle brain delivery and brain metastasis treatment**

Naveed Ullah Khan<sup>a</sup>, Jiang Ni<sup>a,b</sup>, Xiufeng Ju<sup>a</sup>, Tongtong Miao<sup>a</sup>, Haiyan Chen<sup>a</sup>, Liang Han<sup>a,\*</sup>

<sup>a</sup>*Jiangsu Key Laboratory of Neuropsychiatric Diseases Research and College of Pharmaceutical Sciences, Soochow University, Suzhou 215123, China*

<sup>b</sup>*Department of Pharmacy, Affiliated Hospital of Jiangnan University, Wuxi 214000, China*

Received 11 July 2020; received in revised form 14 September 2020; accepted 23 September 2020

\*Corresponding authors. Tel./fax: +86 512 65882089.

E-mail address: hanliang@suda.edu.cn (Liang Han).

Running title: Escape from abluminal LRP1-mediated clearance for boosted brain targeting

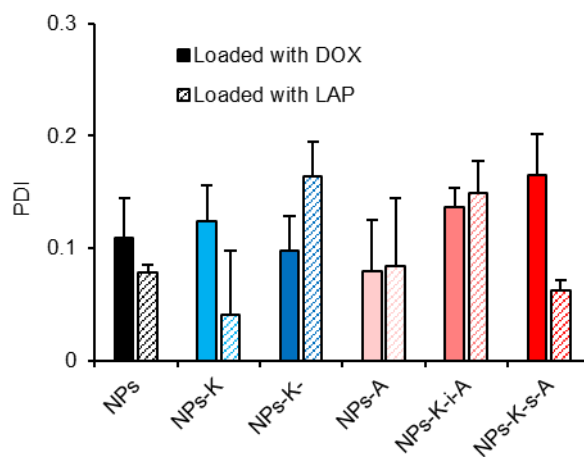

**Figure S1** The polydispersity indices for the hydrodynamic size of DOX-loaded NPs and LAP-loaded NPs by dynamic light scattering. Data are presented as mean  $\pm$ SD ( $n=3$ ).

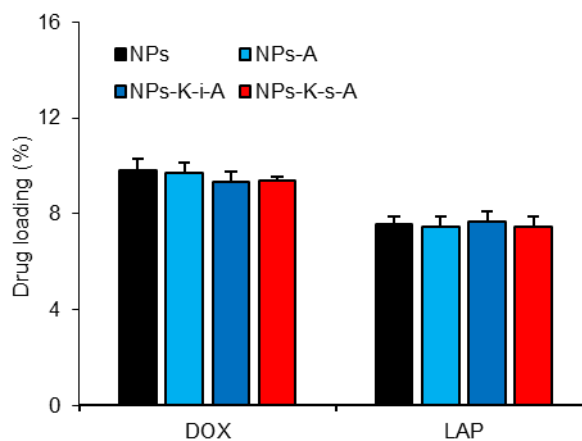

**Figure S2** The loading efficiency of DOX and LAP in various NPs. Data are presented as mean  $\pm$ SD ( $n=3$ ).

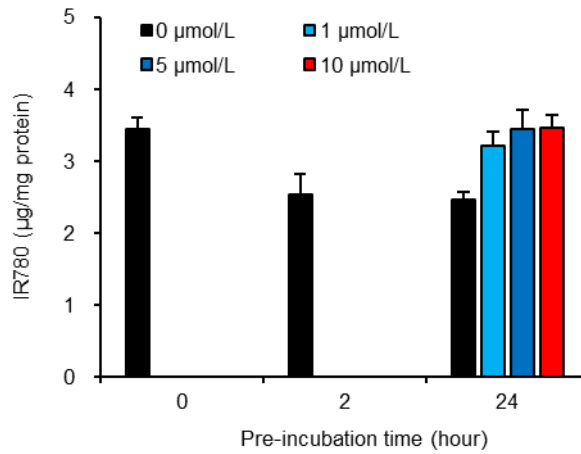

**Figure S3** In vitro uptake of IR780-loaded NPs-K-s-A in bEnd.3 cells. The uptake parameter was set at 1.8 µg IR780/mL for 2 h. The NPs were pre-incubated with MMP1 (7.8 ng/mL) for different time with different concentration specific MMP1 inhibitor FN439. Data are presented as mean ± SD ( $n=4$ ). \*\*\* $P < 0.001$ .

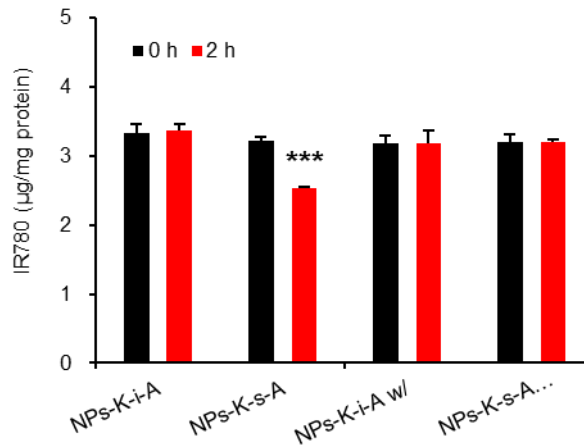

**Figure S4** In vitro uptake of IR780-loaded NPs-K-s-A and NPs-K-i-A in bEnd.3 cells. The uptake parameter was set at 1.8 µg IR780/mL for 2 h. The NPs were pre-incubated with MMP1 (7.8 ng/mL) for 2 h with or without 1 µmol/L FN439. Data are presented as mean ± SD ( $n = 4$ ). \*\*\* $P < 0.001$ .

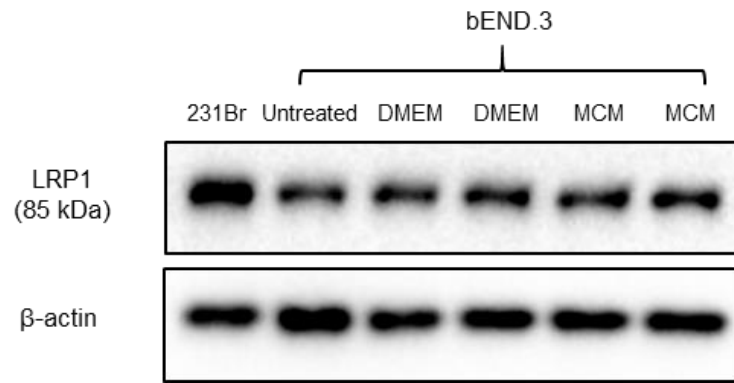

**Figure S5** Representative image of LRP1 expression determined by Western blotting on bEND.3 cells, which were treated with DMEM, or MDA-MB-231Br-HER2 conditioned medium (MCM) for 24 h. 231Br cells were used as control.

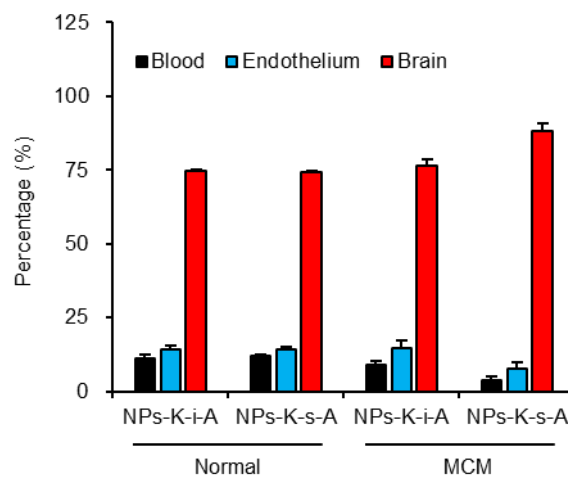

**Figure S6** The distribution percentage of DOX-loaded NPs-K-i-A and NPs-K-s-A in blood side, brain endothelium and brain side on an in vitro BBB model. Amounts of DOX were measured after 6 h incubation in DMEM or MCM. Data are presented as mean  $\pm$ SD ( $n=3$ ).

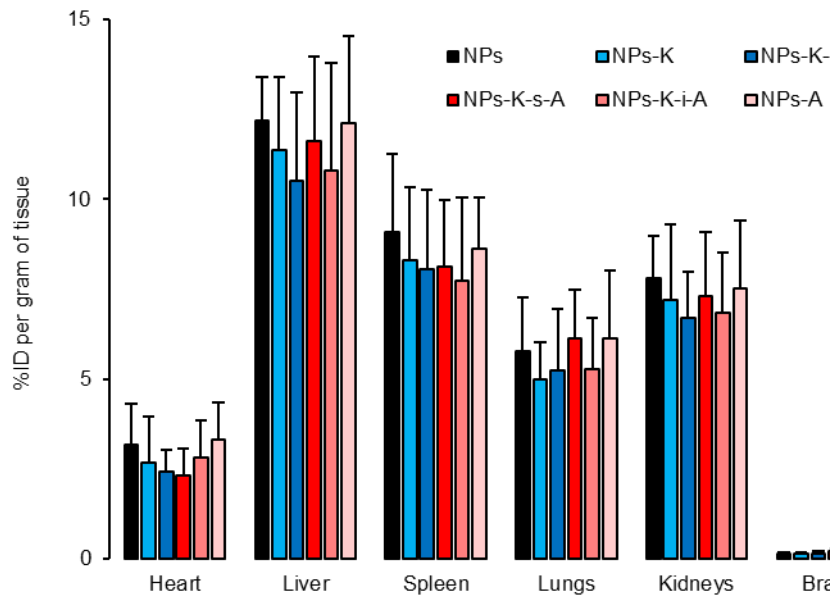

**Figure S7** Quantitative biodistribution (% ID/g) of intravenously injected various IR780-loaded NPs (0.75 mg IR780/kg) in normal mice. Data are presented as mean  $\pm$  SD ( $n=5$ ).

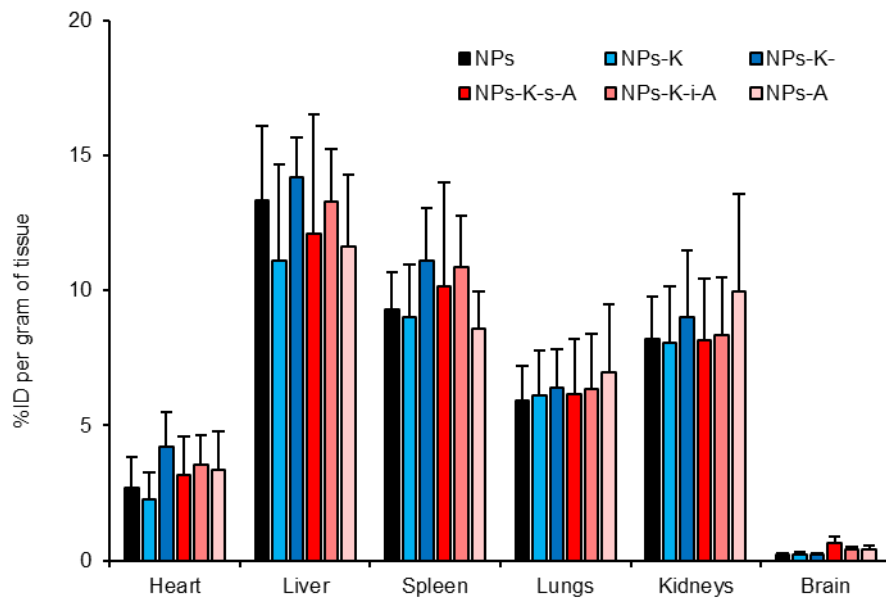

**Figure S8** Quantitative biodistribution (% ID/g) of intravenously injected various IR780-loaded NPs (0.75 mg IR780/kg) in BCBM-bearing mice. Data are presented as mean  $\pm$  SD ( $n=6$ ).

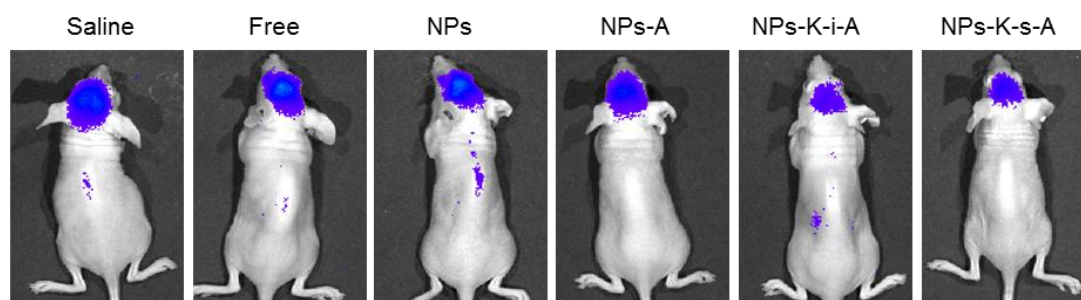

**Figure S9** Representative bioluminescence images of chosen mice for *in vivo* antitumor evaluation. Bioluminescence imaging was performed by IVIS imaging system on Day 1 after intracardiac injection to screen successful animal models.
